# Supplementary material for: Idiosyncratic Fitness Costs of Ampicillin-Resistant Mutants Derived from a Long-Term Experiment with Escherichia coli
Source: MDPI journal article supplement (doi:10.3390/antibiotics11030347), 2022-03-06
Supplement: s1 [file s1]

# Supplementary Material

**Table S1.** Bacterial strains used in this study.

| Evolved ampicillin-resistant clones   |                 |            |
|---------------------------------------|-----------------|------------|
| Strain name                           | Derived from    | Freezer ID |
| Ancestor-1                            | REL606          | KJC108     |
| Ancestor-2                            | REL606          | KJC109     |
| Ancestor-3                            | REL606          | KJC110     |
| Ancestor-4                            | REL606          | KJC111     |
| Ara-5-1                               | REL11339        | KJC114     |
| Ara-5-2                               | REL11339        | KJC122     |
| Ara-5-3                               | REL11339        | KJC130     |
| Ara-6-1                               | REL11389        | KJC115     |
| Ara-6-2                               | REL11389        | KJC123     |
| Ara-6-3                               | REL11389        | KJC131     |
| Ara+4-1                               | REL11348        | KJC112     |
| Ara+4-2                               | REL11348        | KJC120     |
| Ara+4-3                               | REL11348        | KJC128     |
| Ara+5-1                               | REL11367        | KJC113     |
| Ara+5-2                               | REL11367        | KJC121     |
| Ara+5-3                               | REL11367        | KJC129     |
| Ampicillin-sensitive parental strains |                 |            |
| LTEE population                       | LTEE generation | Freezer ID |
| Ancestor                              | 0               | REL606     |
| Ara-5                                 | 50,000          | REL11339   |
| Ara-6                                 | 50,000          | REL11389   |
| Ara+4                                 | 50,000          | REL11348   |
| Ara+5                                 | 50,000          | REL11367   |
| Strains used as common competitors    |                 |            |
| LTEE population                       | LTEE generation | Freezer ID |
| Ancestor                              | 0               | REL607     |
| Ara-5                                 | 40,000          | REL10948   |
| Ara-5                                 | 40,000          | REL11638   |
